# Supplementary material
Source: PubMed Central journal article supplement (PMC6637743)

Figure S1

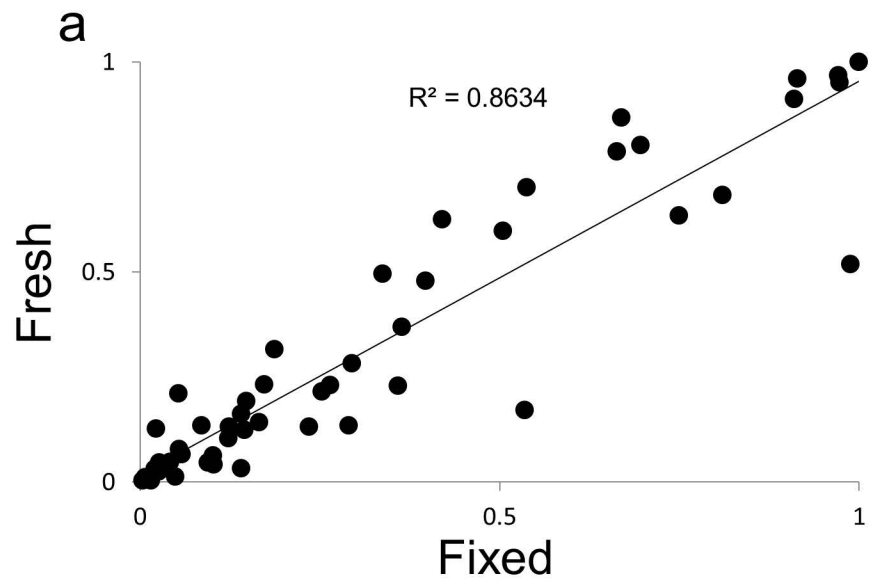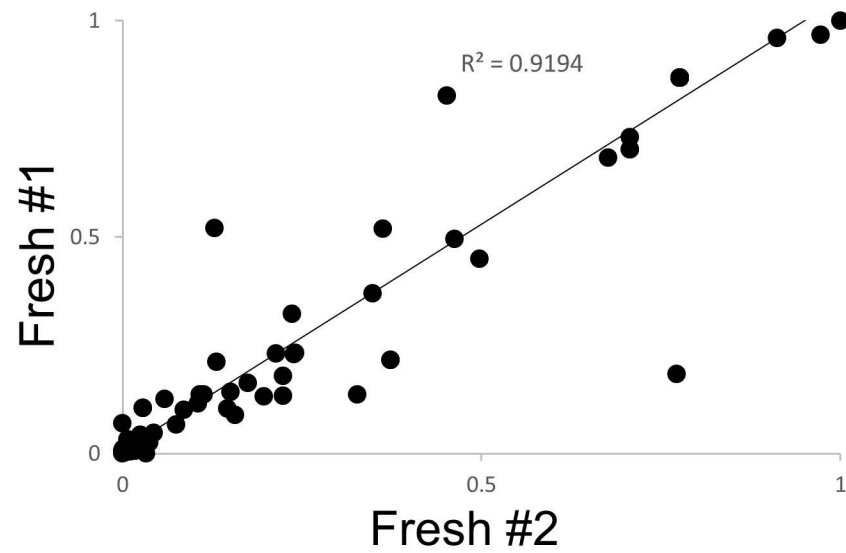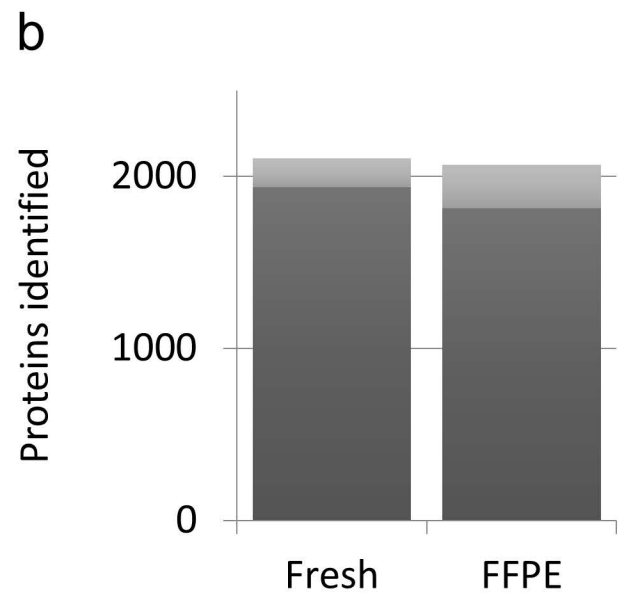

**c**

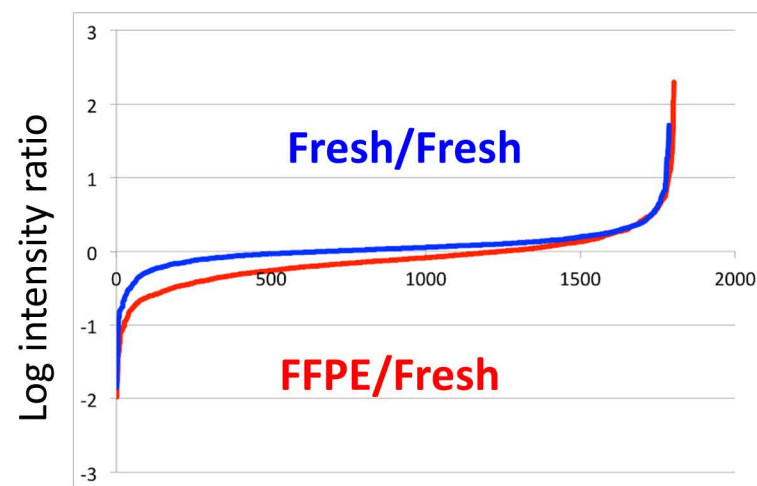

Figure S2

a

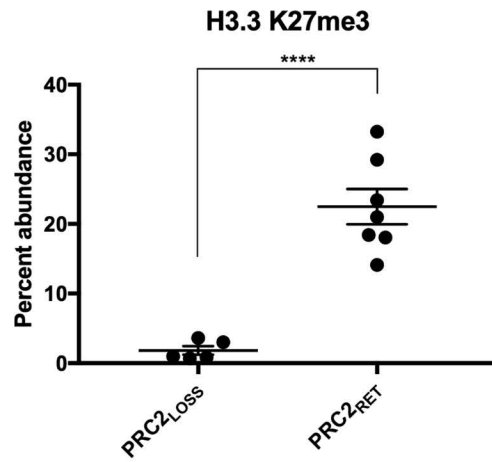

b

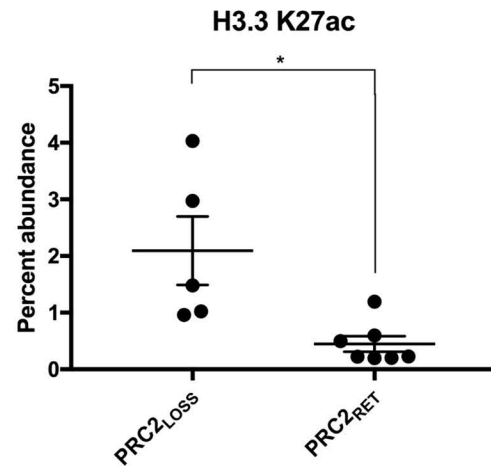

Figure S3

a

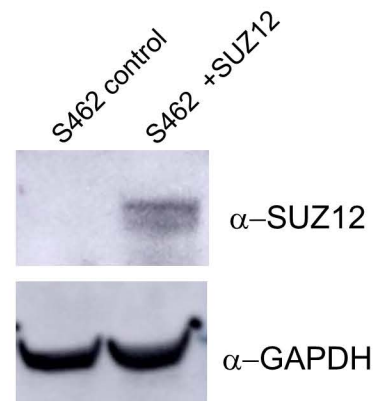

b

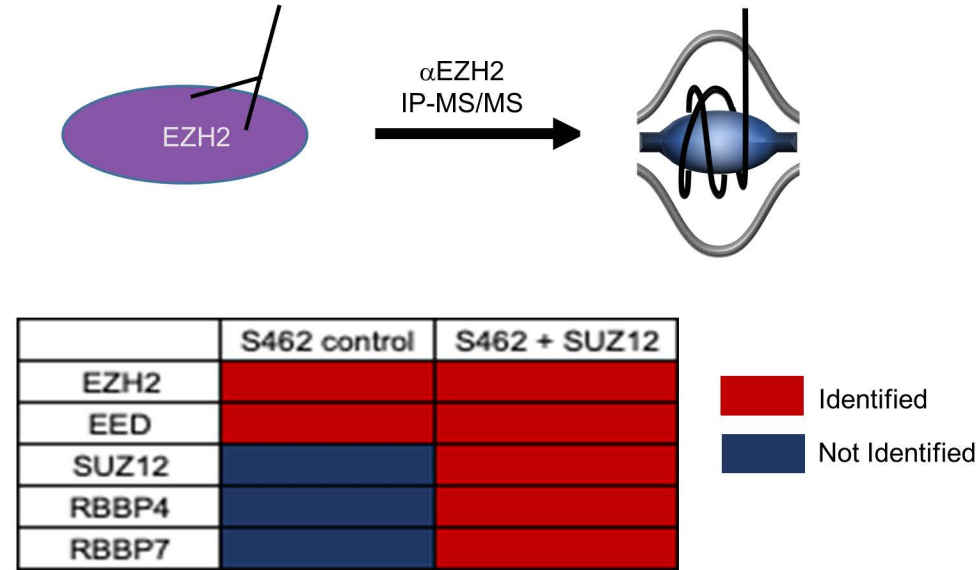

c

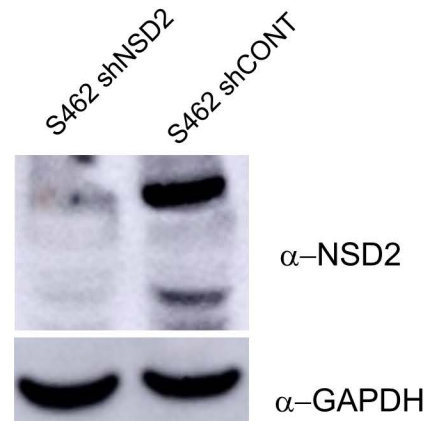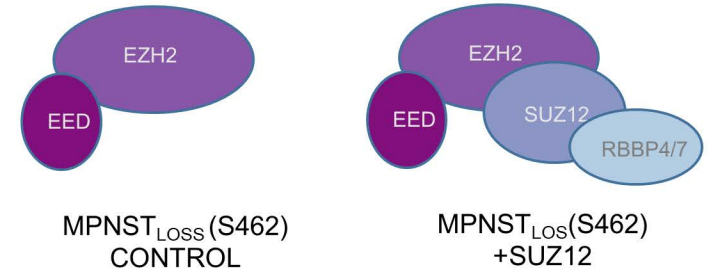

Figure S4

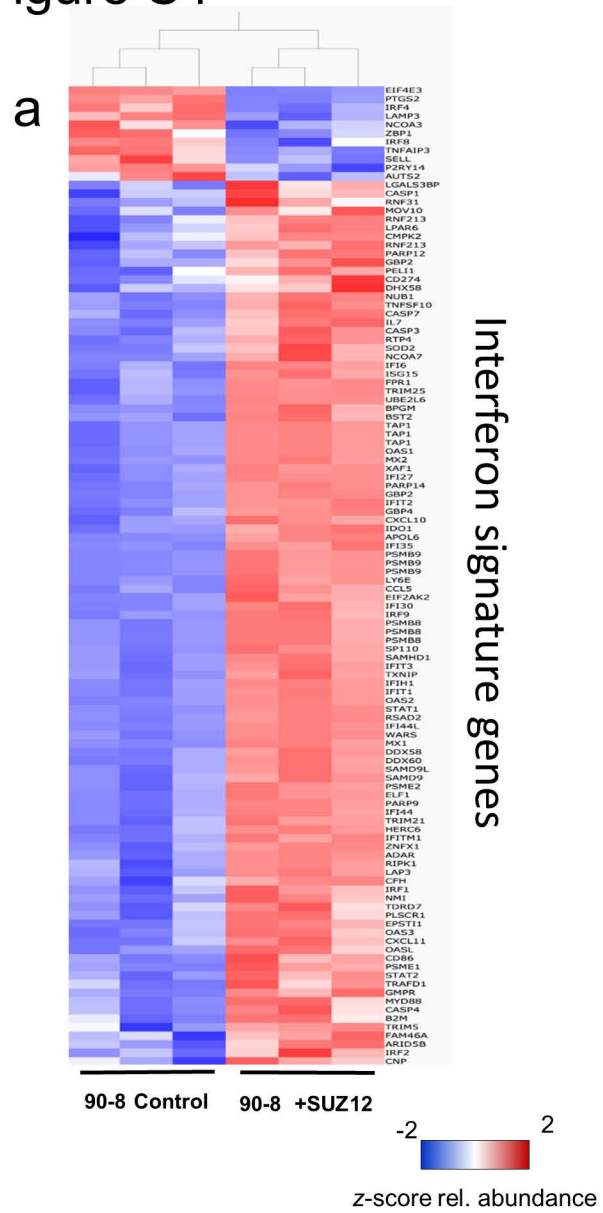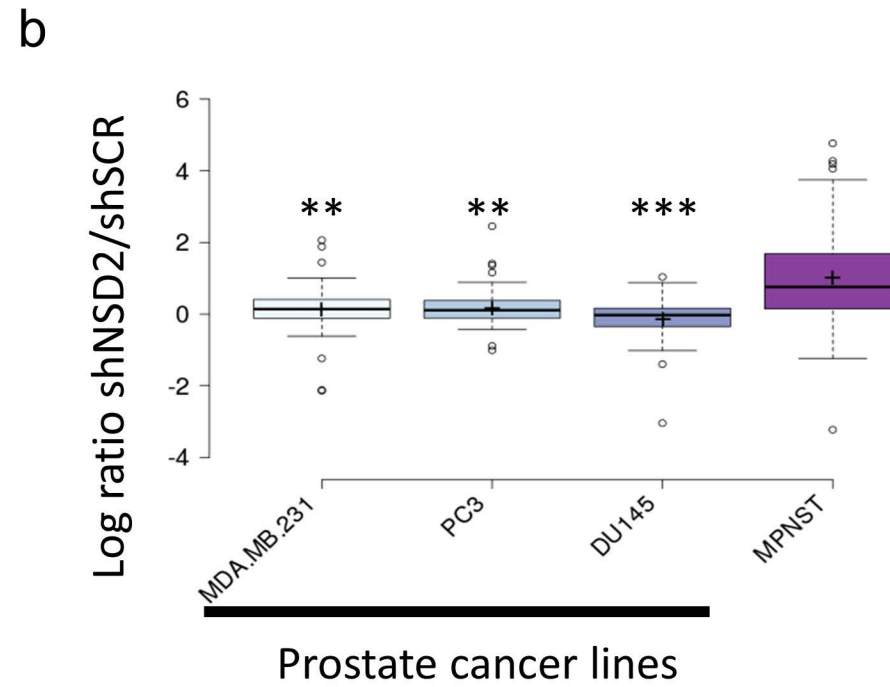

Supplement: NIHMS1525386-supplement-2.pdf [file NIHMS1525386-supplement-2.pdf]
